# Supplementary material for: Ni3N/Co4N nanosheet heterojunction electrocatalyst for hydrogen evolution reaction in alkaline fresh water/simulated seawater
Source: Royal Society of Chemistry journal article supplement (doi:10.1039/d2dt02020c), 2022-01-01
Supplement: d2dt02020c1.pdf [file d2dt02020c1.pdf]

**Ni<sub>3</sub>N/Co<sub>4</sub>N nanosheet heterojunction electrocatalyst for  
hydrogen evolution reaction in alkaline fresh  
water/simulated seawater**

Lixin Zhang,<sup>\*a,b</sup> Hao Wei,<sup>b</sup> Hongfang Jiu,<sup>\*b</sup> Congli Wang,<sup>b</sup> Yaqin Qin<sup>b</sup>, Sicong  
Che,<sup>b</sup> Zhixin Guo,<sup>b</sup> and Yuxin Han,<sup>b</sup>

<sup>a</sup> Shanxi Key Laboratory of High Performance Battery Materials and Devices,  
North University of China, Taiyuan, 030051, People' s Republic of China

<sup>b</sup> School of Chemistry and Chemical Engineering, North University of China, Taiyuan  
030051.

\* Corresponding author.

E-mail address: edwardzlx@163.com (L. X. Zhang), hongfangjiu@163.com (H. F.  
Jiu).

**Table. S1** The HER activity of the Ni<sub>3</sub>N/Co<sub>4</sub>N compared with other recently reported catalysts in the alkaline (1M KOH) medium.

| Catalysts                                            | $\eta$<br>(mV) | Tafel slope<br>(mV dec <sup>-1</sup> ) | Ref.      |
|------------------------------------------------------|----------------|----------------------------------------|-----------|
| Ni <sub>3</sub> N/Co <sub>4</sub> N                  | 58             | 93                                     | This work |
| Pt/C                                                 | 29             | 66                                     | 1         |
| NiCoN/C                                              | 103            | -                                      | 2         |
| Ni <sub>3</sub> N-VN                                 | 64             | 37                                     | 3         |
| Co-Ni <sub>3</sub> N                                 | 194            | 156                                    | 4         |
| Co <sub>3</sub> N                                    | 113            | 102.4                                  | 5         |
| N-NiCo LDH                                           | 100            | 123                                    | 6         |
| C@NiCo <sub>12</sub>                                 | 105            | 157                                    | 7         |
| MNi <sub>63</sub> Co <sub>37</sub> /rGO <sub>5</sub> | 115            | 45                                     | 8         |
| NiCo/NiCo <sub>2</sub> S <sub>4</sub> @NiCo/NF       | 132            | 58.2                                   | 9         |

1 G. Zhou, G. Liu, X. Liu, Q. Yu, H. Mao, Z. Xiao and L. Wang, *Adv. Funct. Mater.*, 2022, 32, 2107608.

2 J. Lai, B. Huang, Y. Chao, X. Chen and S. Guo, *Adv. Mater.*, 2019,**31**,1805541.

3 H. Yan, Y. Xie, A. Wu, Z. Cai, L. Wang, C. Tian, et al. *Adv. Mater.*, 2019,**31**,1901174.

4 C. Zhu , A. L.Wang, W. Xiao, D. Chao, X. Zhang, N. H.Tiep, et al.*Adv. Mater.*,2018,**30**,1705516.

5 H. W. Choi, D. I. Jeong, S. Woo, S. B. Kwon, S. Wu, J. H. Kim, et al. *Appl. Surf. Sci.*, 2020,**529**,147177.

6 S. Tan, W. Ouyang, Y. Ji and Q. Hong, *J. Alloys Compd.*, 2021,**889**,161528.

- 7 T. Chen, R. Zhang, G. Chen, J. Huang, W. Chen, X. Wang, D. Chen, C. Li and K. Ostrikov, *Catal Today*, 2019, **337**, 147-154.
- 8 J. Dong, T. Sun, Y. Zhang, H. Zhang, S. Lu, D. Hu, J. Chen and L. Xu, *J. Colloid Interface Sci.*, 2021, **599**, 603-610.
- 9 Y. Ning, D. Ma, Y. Shen, F. Wang and X. Zhang, *Electrochim. Acta.* 2018,**265**:19-31.

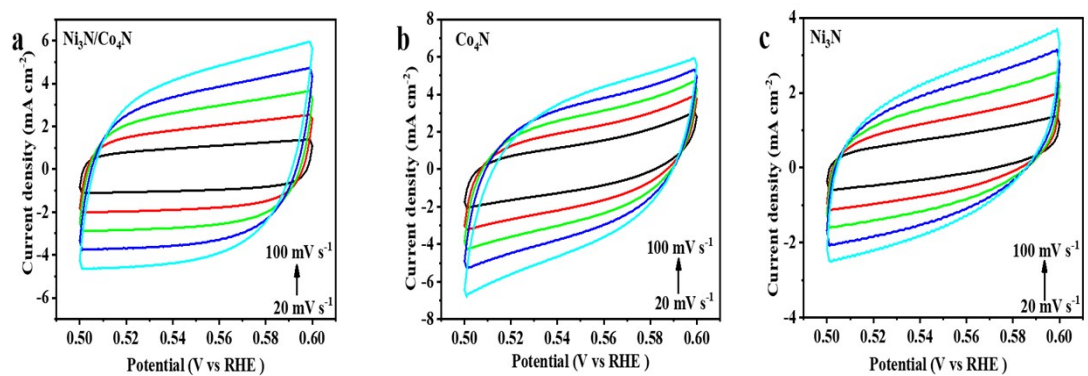

**Fig. S1.** Cyclic voltammograms of (a) Ni<sub>3</sub>N/Co<sub>4</sub>N, (b) Co<sub>4</sub>N, (c) Ni<sub>3</sub>N at the different scan rates varying from 20 to 100 mV s<sup>-1</sup>.

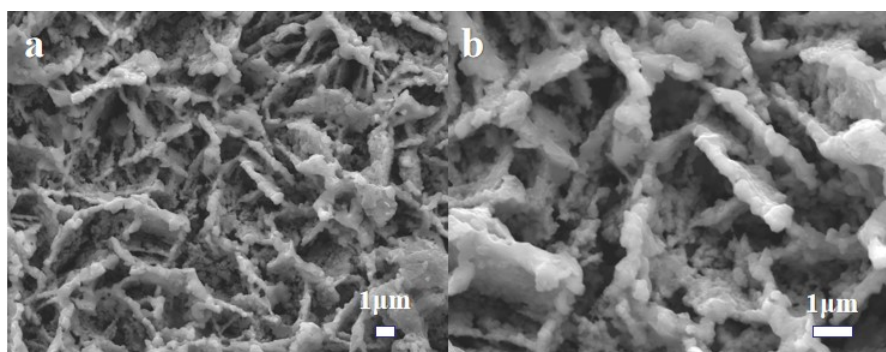

Fig.S2 The SEM images of  $\text{Ni}_3\text{N}/\text{Co}_4\text{N}$  in 1 M KOH after durability test

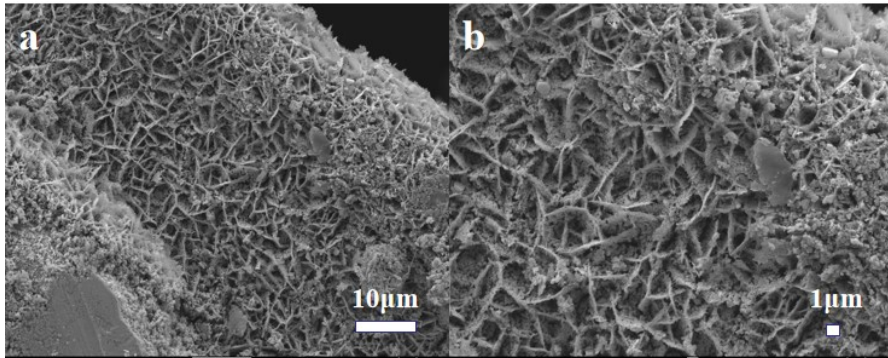

Fig.S3 The SEM images of  $\text{Ni}_3\text{N}/\text{Co}_4\text{N}$  in alkaline simulated seawater after durability test.

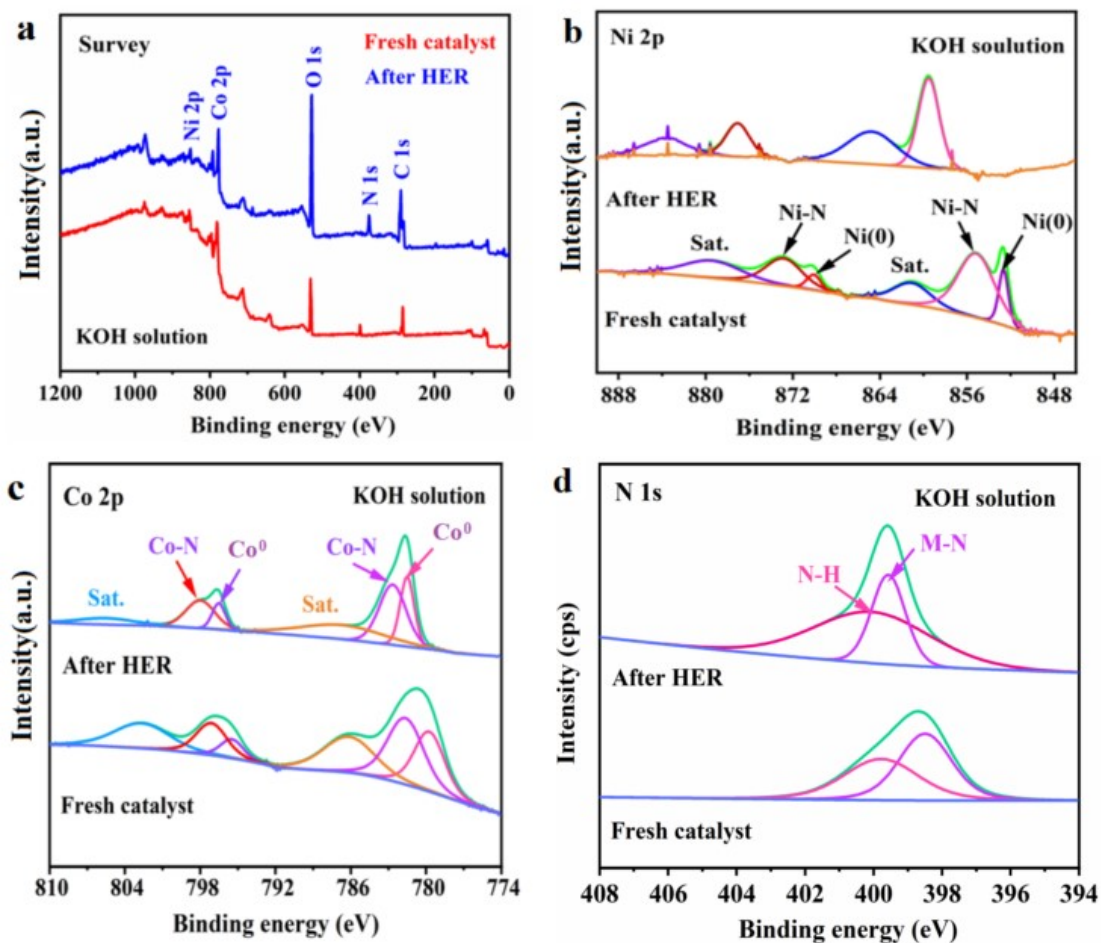

Fig.S4 The XPS spectrum of Ni<sub>3</sub>N/Co<sub>4</sub>N in 1 M KOH after durability test.

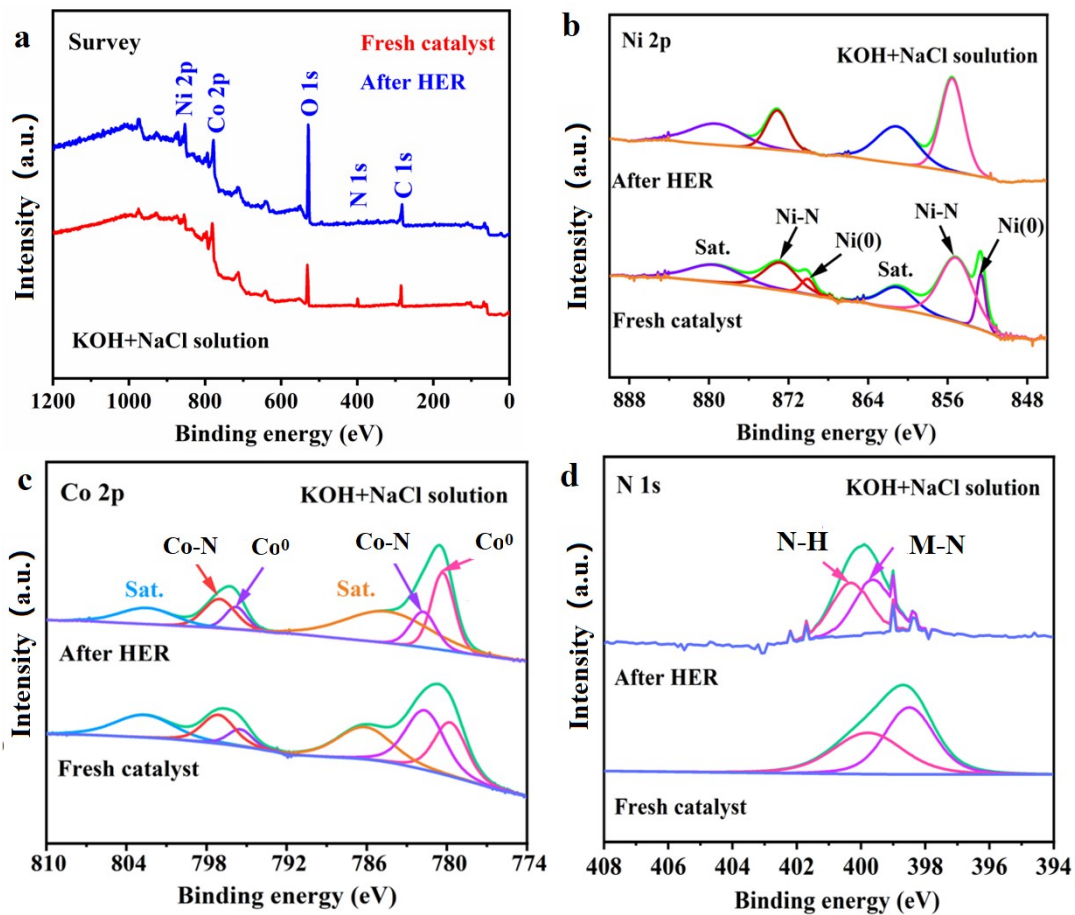

Fig.S5 The XPS spectrum of Ni<sub>3</sub>N/Co<sub>4</sub>N in alkaline simulated seawater after durability test.
